# Supplementary material for: Design of macroporous TiO2 thin film photocatalysts with enhanced photofunctional properties
Source: Royal Society of Chemistry journal article supplement (doi:10.1039/c0ee00389a), 2011-01-01
Supplement: c0ee00389a.pdf [file c0ee00389a.pdf]

## Supplementary Information

### **Design of macroporous TiO<sub>2</sub> thin film photocatalysts with enhanced photofunctional properties**

Takashi Kamegawa, Norihiko Suzuki and Hiromi Yamashita\*

*Division of Materials and Manufacturing Science, Graduate School of Engineering,  
Osaka University, 2-1 Yamadaoka, Suita, Osaka 565-0871, Japan.*

*Fax & Tel: +81-6-6879-7457*

*E-mail: yamashita@mat.eng.osaka-u.ac.jp*

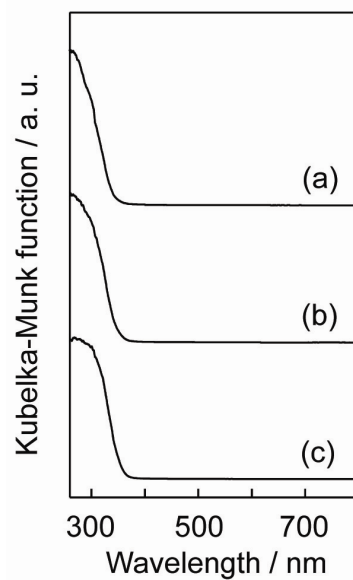

**Fig. S1.** UV-vis absorption spectra of (a)  $\text{TiO}_2/\text{Q}$ , (b)  $m_{10}\text{-TiO}_2/\text{Q}$ , and (c)  $m_{20}\text{-TiO}_2/\text{Q}$ .

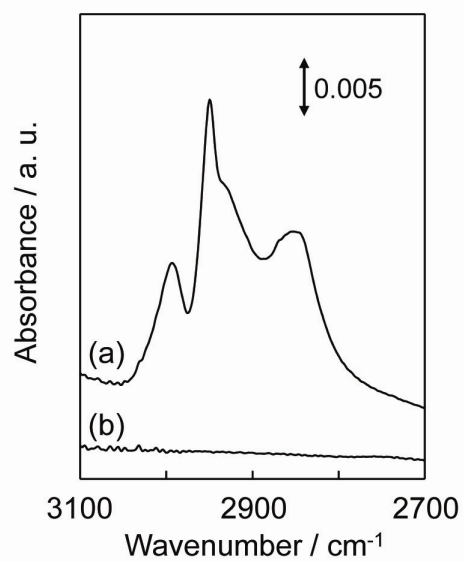

**Fig. S2.** FT-IR spectra of  $m_{20}\text{-TiO}_2/\text{Q}$  before (a) and after (b) calcination at 723 K for 6 h.
